# Supplementary material
Source: ML conference proceedings conference paper supplement (https://openaccess.thecvf.com/content/WACV2023/html/Sauvalle_Unsupervised_Multi-Object_Segmentation_WACV_2023_paper.html)
Supplement: Supplementary file 1 [file Sauvalle_Unsupervised_Multi-Object_Segmentation_WACV_2023_supplemental.pdf]

# Unsupervised multi-object segmentation using attention and soft-argmax

## Supplementary Material

### 1. Hyperparameter values

The hyperparameter values used for the proposed model are listed in Table 1.

### 2. Pseudo-code for objects encoder and decoder

The full encoding and rendering process is described in Algorithms 1 and 2.

### 3. Additional implementation details

The glimpse convolutional generator is described in Table 2.

Synthetic datasets and preprocessing codes were downloaded from the following public repositories:

- <https://www.robots.ox.ac.uk/~vgg/data/clevrtex/>
- <https://ogroth.github.io/shapestacks/>
- [https://github.com/deepmind/multi\\_object\\_datasets](https://github.com/deepmind/multi_object_datasets)
- <https://github.com/applied-ai-lab/genesis>.

The Segformer pretrained weights were downloaded from the following link:

<https://huggingface.co/nvidia/mit-b3>

The architecture of the U-net implemented for the ablation study is described in Table 3. It contains a sequence of downsample blocks which output feature maps of decreasing sizes, a center block which takes as input the feature map produced by the last downsample block, and upsample blocks, which take as input both the output of the previous upsample or center block and the feature map of the same size produced by corresponding downsample block.

- A downsample block is composed of a convolutional layer with stride 2 and kernel size 4, with batch normalization and CELU, followed by a residual convolutional layer with stride 1 and kernel size 3 with batch normalization and CELU.
- The center block is composed of a convolutional layer with stride 1 and kernel size 3 with batch normalization and CELU.
- An upsample block is composed of a residual convolutional layer with stride 1 and kernel size 3 with batch normalization and CELU, followed by a transpose convolutional layer with stride 2 and kernel size 4, with batch normalization and CELU.

### 4. Additional image samples

Additional image samples are provided in Figures 1-6.

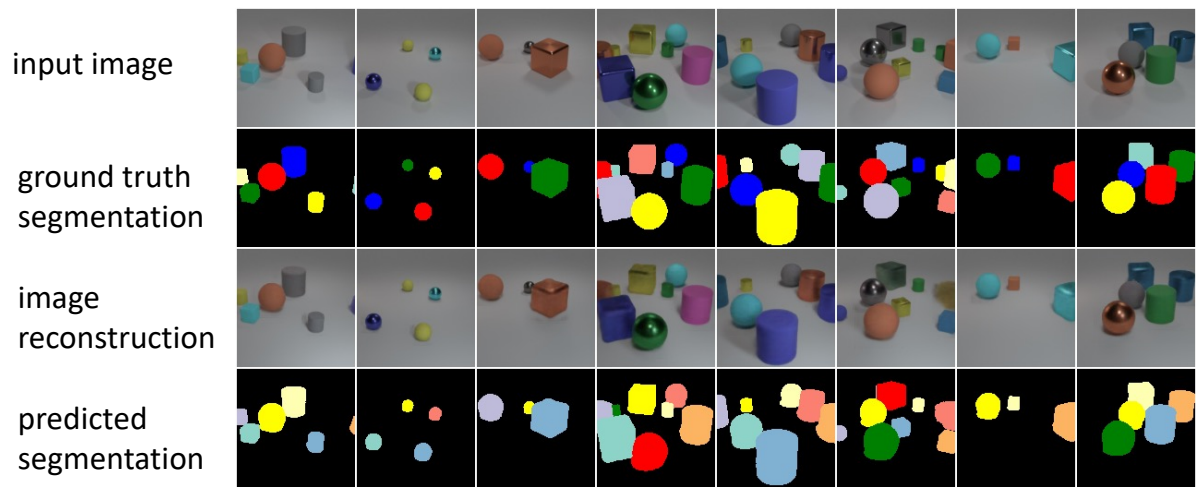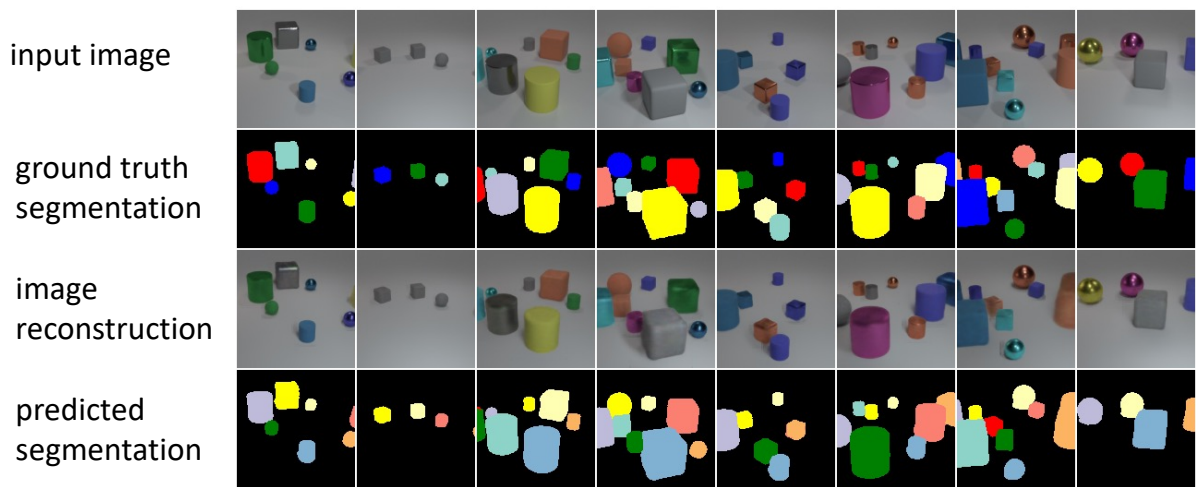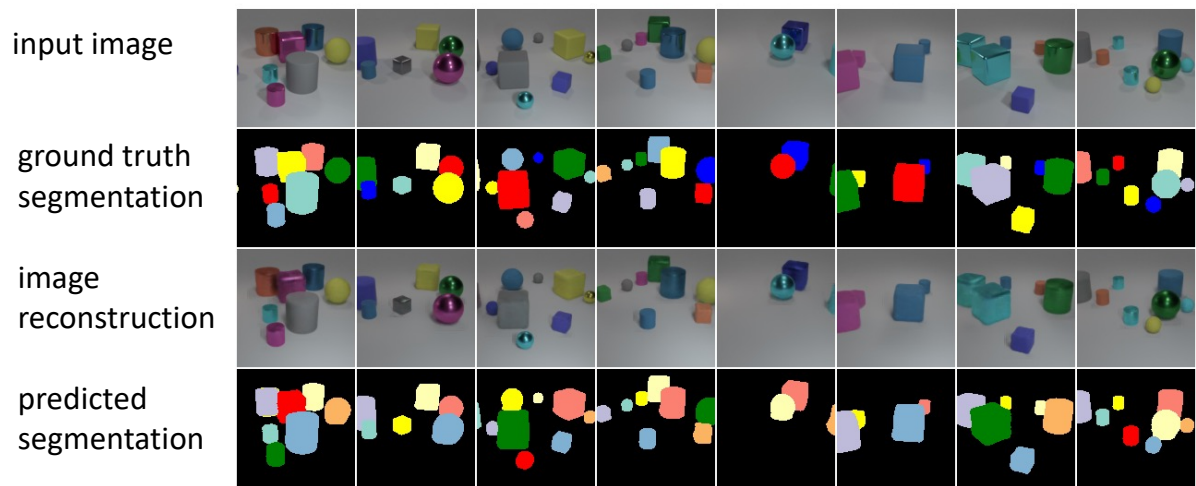

Figure 1. Examples of segmentation predictions on CLEVR test dataset

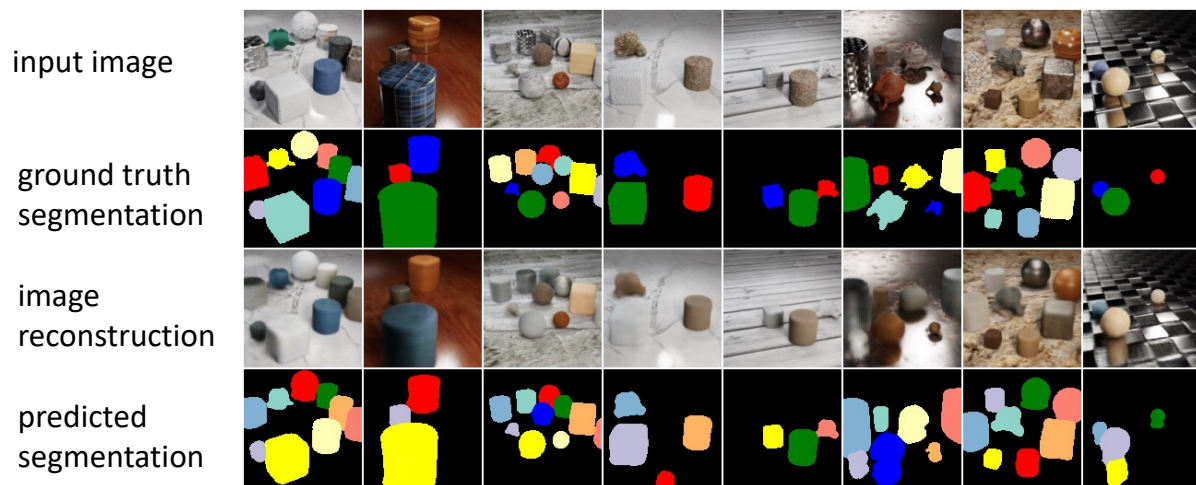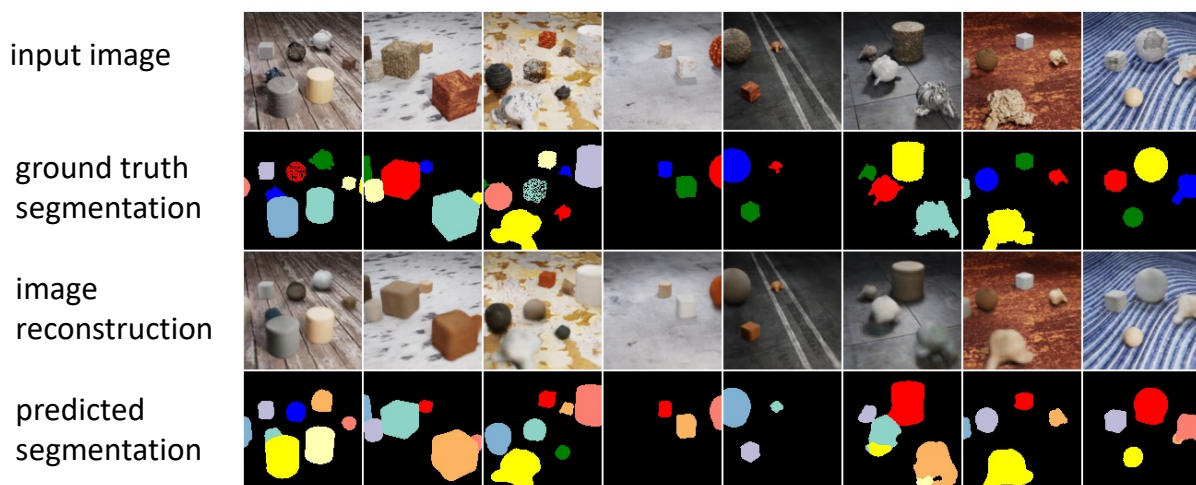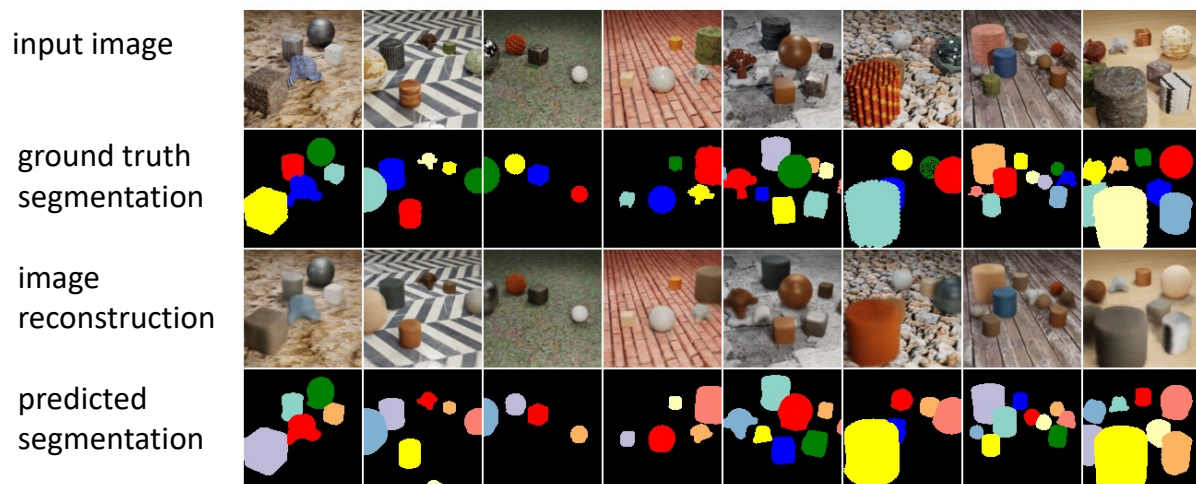

Figure 2. Examples of segmentation predictions on CLEVRTEX test dataset

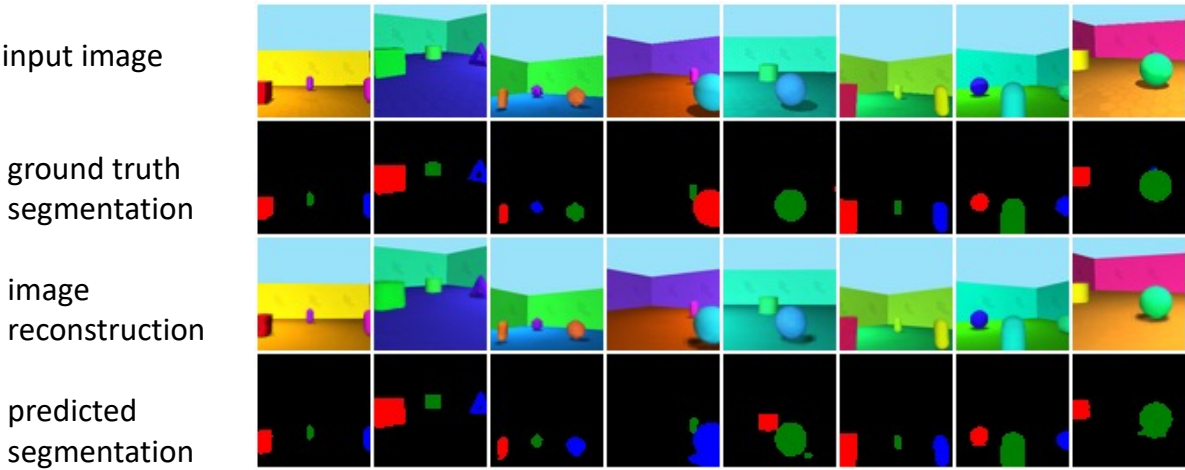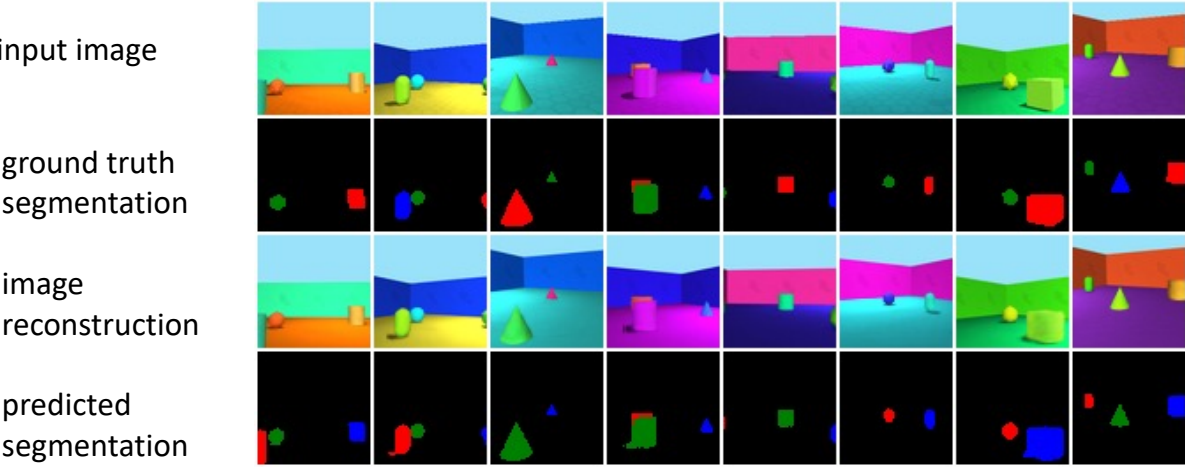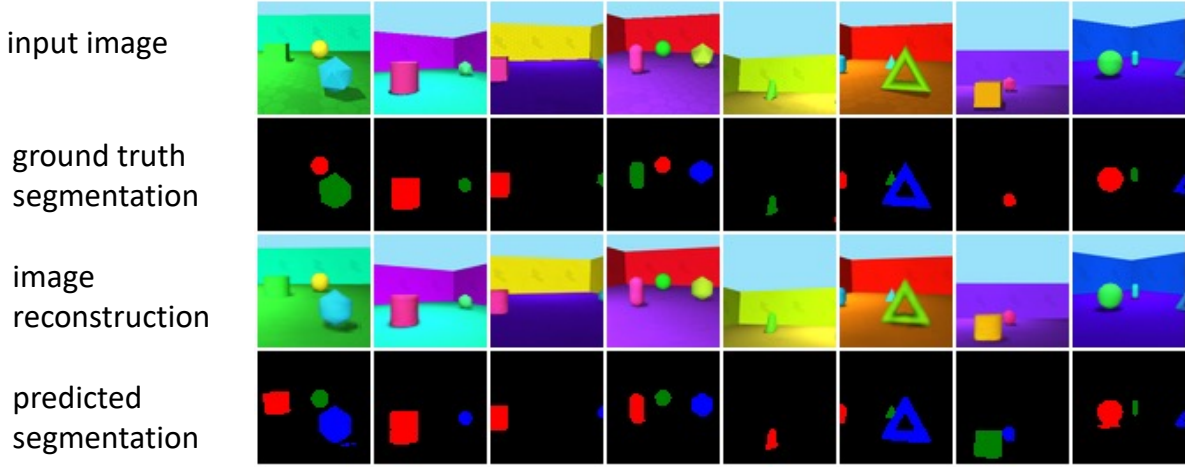

Figure 3. Examples of segmentation predictions on ObjectsRoom test dataset



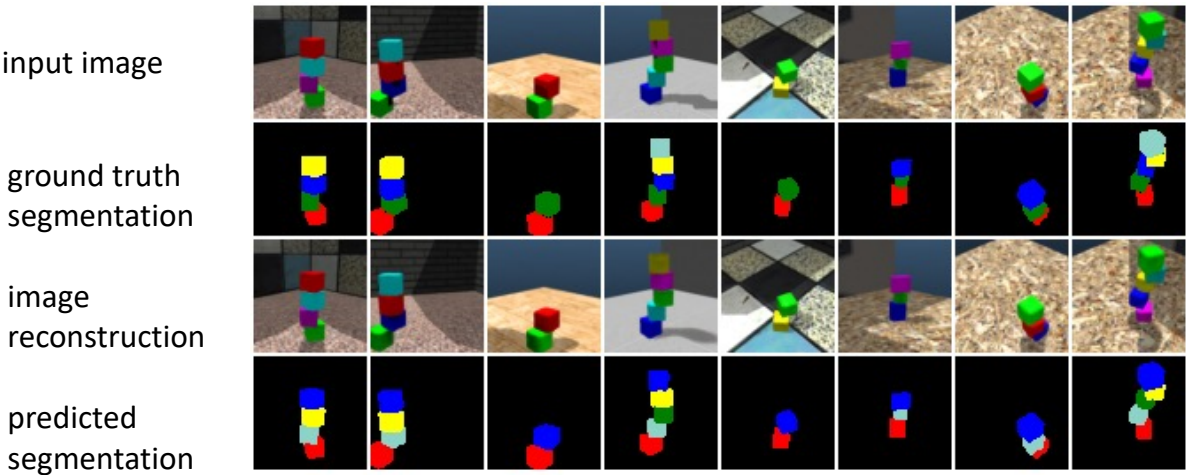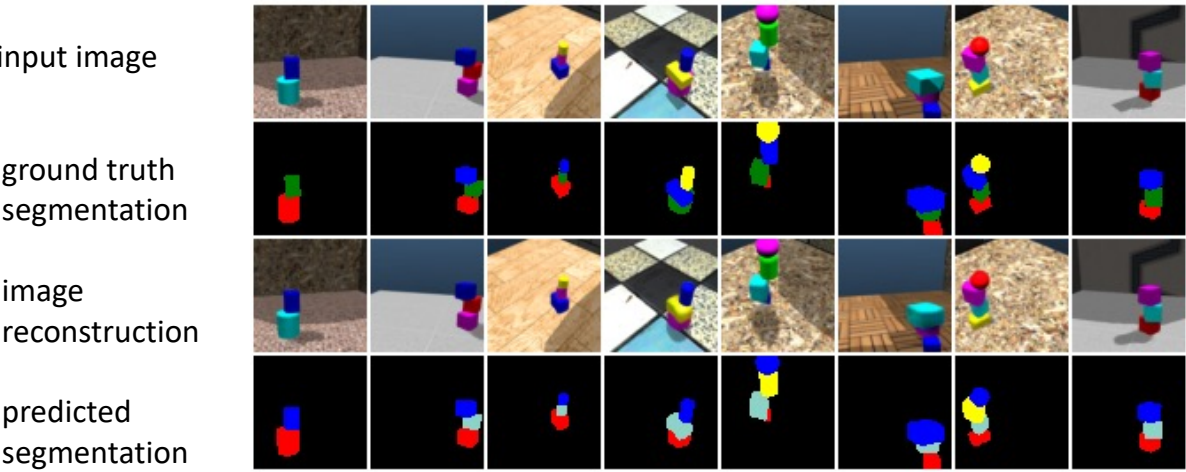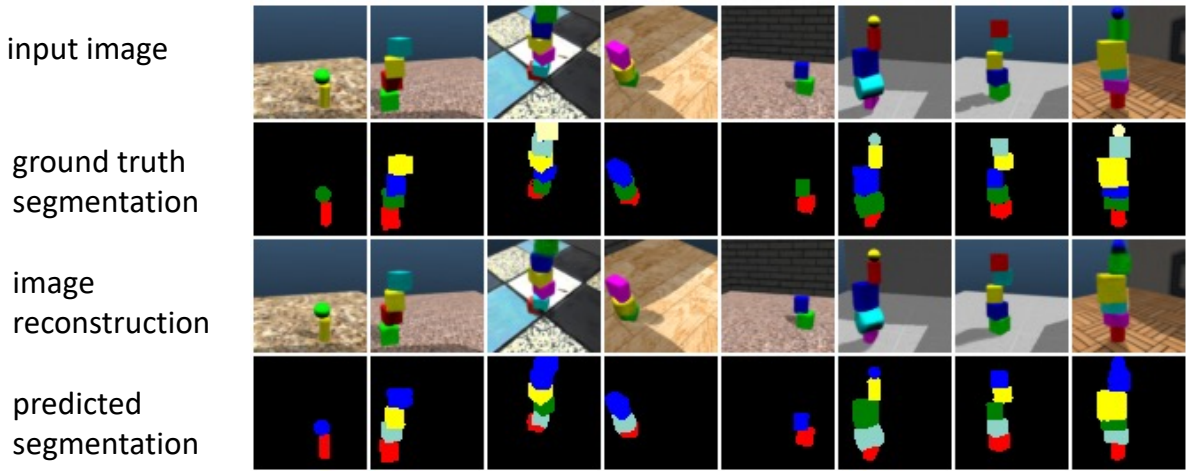

Figure 4. Examples of segmentation predictions on ShapeStacks test dataset (using a model without transformer)

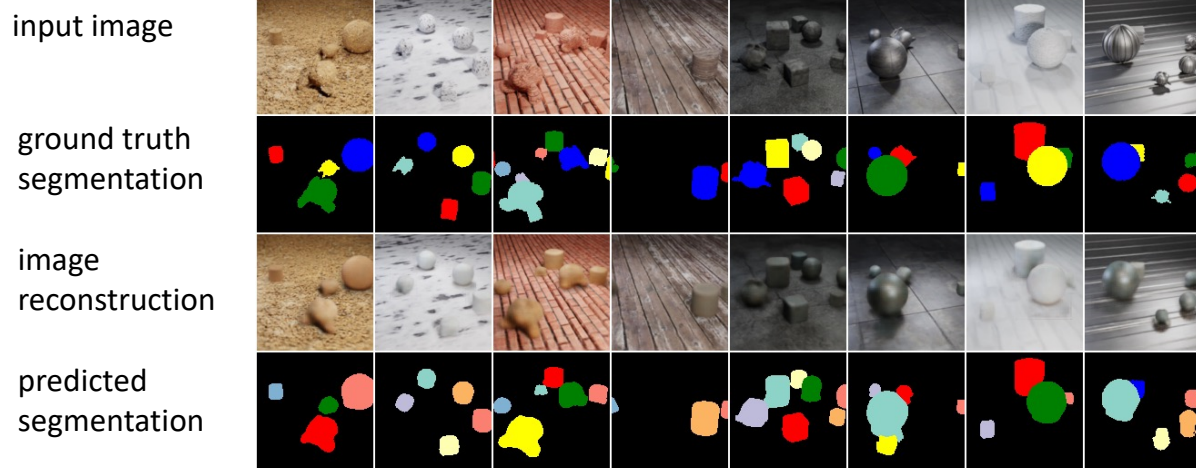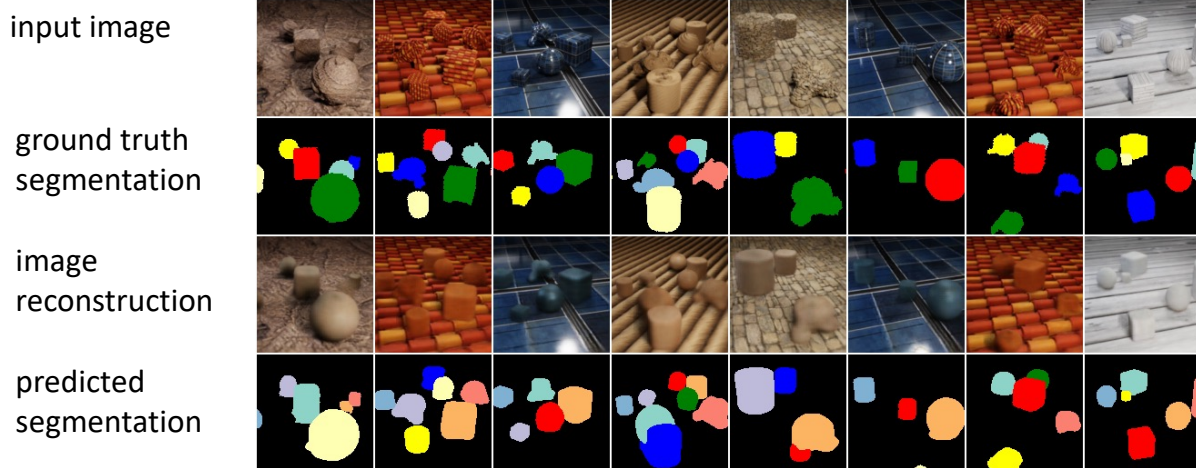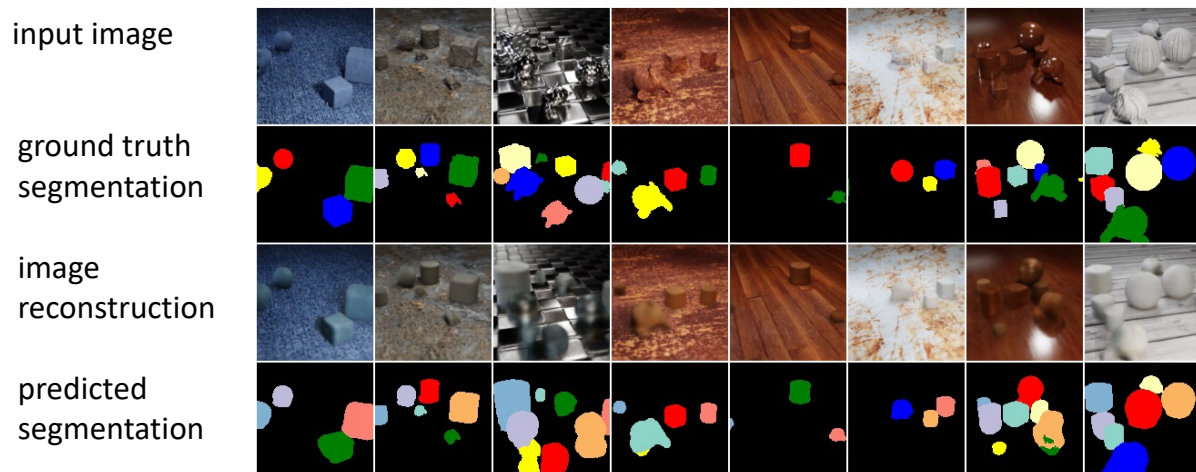

Figure 5. Examples of segmentation predictions on CAMO test dataset using a model trained on CLEVRTEX only



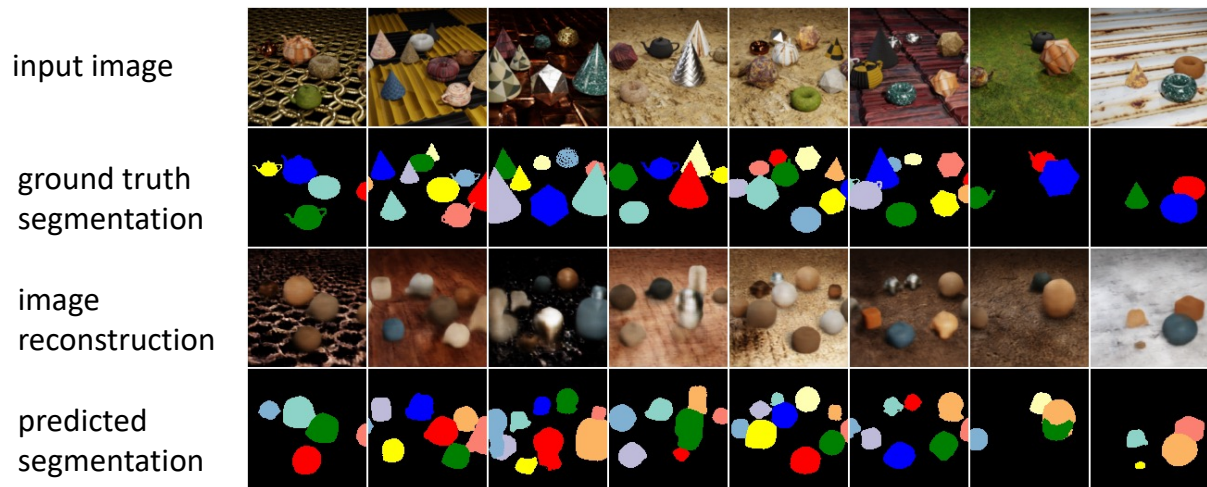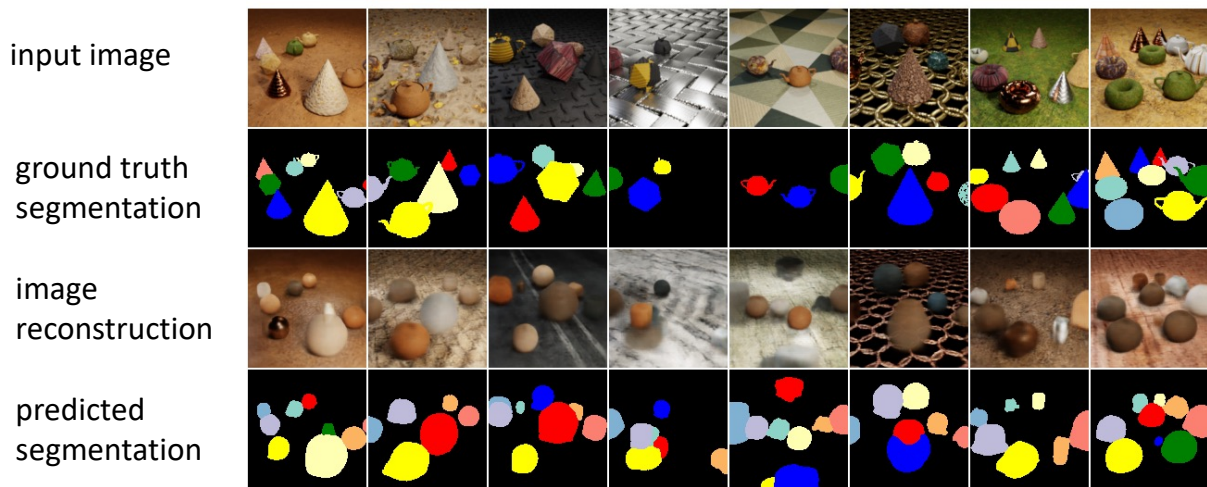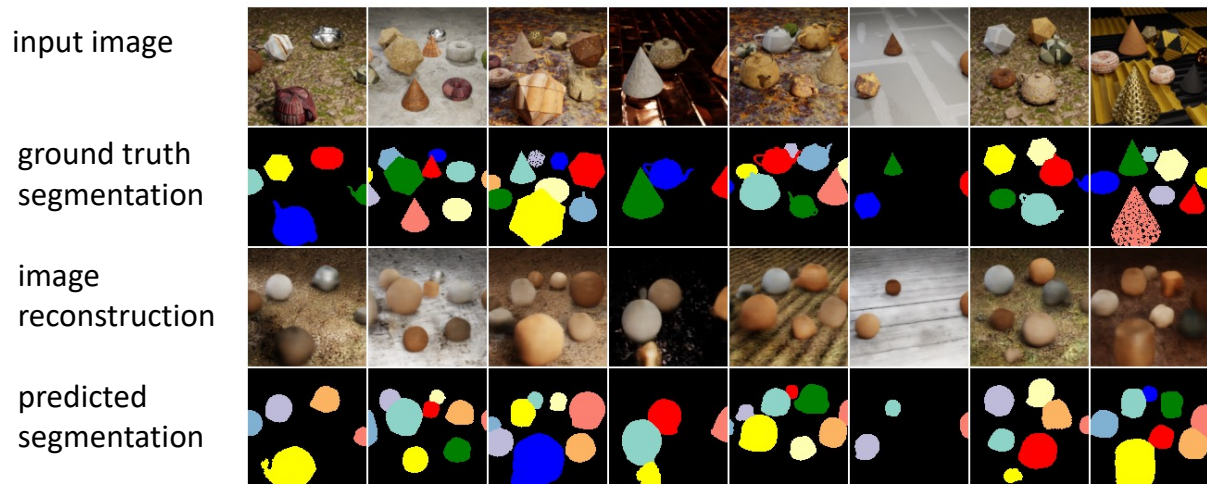

Figure 6. Examples of segmentation predictions on OOD test dataset using a model trained on CLEVRTEX only

Table 1. Hyperparameter values

| hyperparameter description                                                | notation          | value             |
|---------------------------------------------------------------------------|-------------------|-------------------|
| Background model pretraining:                                             |                   |                   |
| batch size                                                                |                   | 128               |
| learning rate                                                             |                   | $2 \cdot 10^{-3}$ |
| number of background model training iterations:                           |                   |                   |
| - datasets with fixed backgrounds (CLEVR)                                 |                   | 2500              |
| - datasets with complex backgrounds (CLEVRTEXT, ShapeStacks, ObjectsRoom) |                   | 500000            |
| Foreground model training:                                                |                   |                   |
| batch size                                                                |                   | 64                |
| learning rate                                                             |                   | $4 \cdot 10^{-5}$ |
| Adam $\beta_1$                                                            |                   | 0.90              |
| Adam $\beta_2$                                                            |                   | 0.98              |
| Adam $\epsilon$                                                           |                   | $10^{-9}$         |
| number of foreground model training iterations                            |                   | 125000            |
| number of steps of phase 2 (CT scenario)                                  |                   | 30000             |
| number of steps of learning rate warmup phase                             |                   | 5000              |
| number of steps of pixel entropy loss weight warmup phase                 | $N_{pixel}$       | 10000             |
| initial value of background activation before training                    | $\alpha_0$        | $e^{11}$          |
| dimension of $z_{what}$                                                   | $d_{z_{what}}$    | 32                |
| pixel entropy loss weight                                                 | $\lambda_{pixel}$ | $1 \cdot 10^{-2}$ |
| minimum value of inverse scaling factor                                   | $s_{min}$         | 1.3               |
| maximum value of inverse scaling factor                                   | $s_{max}$         | 24                |
| dimension of inputs and outputs of transformer encoder                    | $d_T$             | 256               |
| number of heads of transformer encoder layer                              |                   | 8                 |
| dimension of feedforward transformer layer                                |                   | 512               |
| number of layers of transformer encoder                                   |                   | 6                 |



---

**Algorithm 1: Encoding**

---

**Input:** input image  $\mathbf{X}$

**Output:** object latents  $\{z_k^{what}, x_k, y_k, s_k, \alpha_k\}_{1 \leq k \leq K}$

// feature and attention maps generation

$(\Phi, A_1, \dots, A_K) = \text{SegformerForSemanticSegmentation}(\mathbf{X})$

**for**  $k \leftarrow 1$  **to**  $K$  **do**

$$\mathcal{A}_k(i, j) = \text{Softmax}(A_k)(i, j) = \frac{e^{A_k(i, j)}}{\sum_{i, j} e^{A_k(i, j)}}$$

**end**

// computation of positions and feature vectors before transformer refinement

**for**  $i \leftarrow 1$  **to**  $w^*$ ,  $j \leftarrow 1$  **to**  $h^*$  **do**

$$x(i) = 2 \frac{i-1}{w^*-1} - 1; y(j) = 2 \frac{j-1}{h^*-1} - 1$$

**end**

**for**  $k \leftarrow 1$  **to**  $K$  **do**

$$x_k^0 = \sum_{i, j} x(i) \mathcal{A}_k(i, j); y_k^0 = \sum_{i, j} y(j) \mathcal{A}_k(i, j)$$
$$\phi_k^0 = \sum_{i, j} \Phi(i, j) \mathcal{A}_k(i, j)$$

**end**

// transformer refinement of positions and feature vectors

$(x_k, y_k, \phi_k)_{1 \leq k \leq K} = \text{LinearProjection}(\text{TransformerEncoder}(\text{LinearEmbedding}((x_k^0, y_k^0, \phi_k^0)_{1 \leq k \leq K})))$

// latent computations

**for**  $k \leftarrow 1$  **to**  $K$  **do**

$$x_k = \text{clamp}(x_k, \text{min} = -1, \text{max} = 1); y_k = \text{clamp}(y_k, \text{min} = -1, \text{max} = 1)$$
$$(s_k, \alpha_k, z_k^{what}) = \phi_k$$
$$s_k = s_{\text{min}} + (s_{\text{max}} - s_{\text{min}}) \sigma(s_k)$$
$$\alpha_k = e^{\alpha_k}$$

**end**

**Output:**  $\{z_k^{what}, x_k, y_k, s_k, \alpha_k\}_{1 \leq k \leq K}$

---

---

**Algorithm 2: Rendering**

---

**Input:** object latents  $\{z_k^{what}, x_k, y_k, s_k, \alpha_k\}_{1 \leq k \leq K}$ , background image  $L_0$ , background mask  $M_0 = 1$ , learned background activation  $\alpha_0$

**Output:** Image reconstruction  $\hat{\mathbf{X}}$

// Obtain the object appearance  $\mathbf{o}_k$  and segmentation mask  $\mathbf{m}_k$

**for**  $k \leftarrow 1$  **to**  $K$  **do**

$$\mathbf{o}_k, \mathbf{m}_k = \text{GlimpseGenerator}(z_k^{what})$$

**end**

// translation and scaling using a spatial transformer network (STN)

**for**  $k \leftarrow 1$  **to**  $K$  **do**

$$L_k = \text{STN}(\mathbf{o}_k, x_k, y_k, s_k)$$
$$M_k = \text{STN}(\mathbf{m}_k, x_k, y_k, s_k)$$

**end**

// occlusion computations

**for**  $k \leftarrow 0$  **to**  $K$  **do**

$$w_k = \frac{\alpha_k M_k}{\sum_{i=0}^K \alpha_i M_i}$$

**end**

// combination of image layers

$$\hat{\mathbf{X}} = \sum_{k=0}^K w_k L_k;$$

**Output:**  $\hat{\mathbf{X}}$

---

Table 2. glimpse generator architecture

| 64x64 images             |      |                |        |         |                      | 128x128 images           |      |                |        |         |                       |
|--------------------------|------|----------------|--------|---------|----------------------|--------------------------|------|----------------|--------|---------|-----------------------|
| Layer                    | Size | Ch             | Stride | Padding | Norm./Act.           | Layer                    | Size | Ch             | Stride | Padding | Norm./Act.            |
| Input                    | 1    | $d_{z_{what}}$ |        |         |                      | Input                    | 1    | $d_{z_{what}}$ |        |         |                       |
| Transp Conv $2 \times 2$ | 2    | 64             | 2      | 0       | GroupNorm(4,64)/CELU | Transp Conv $2 \times 2$ | 2    | 128            | 2      | 0       | GroupNorm(8,128)/CELU |
| Transp Conv $4 \times 4$ | 4    | 32             | 2      | 1       | GroupNorm(2,32)/CELU | Transp Conv $4 \times 4$ | 4    | 64             | 2      | 1       | GroupNorm(4,64)/CELU  |
| Transp Conv $4 \times 4$ | 8    | 16             | 2      | 1       | GroupNorm(1,16)/CELU | Transp Conv $4 \times 4$ | 8    | 32             | 2      | 1       | GroupNorm(2,32)/CELU  |
| Transp Conv $4 \times 4$ | 16   | 8              | 2      | 1       | GroupNorm(1,8)/CELU  | Transp Conv $4 \times 4$ | 16   | 16             | 2      | 1       | GroupNorm(1,16)/CELU  |
| Transp Conv $4 \times 4$ | 32   | 4              | 2      | 1       |                      | Transp Conv $4 \times 4$ | 32   | 8              | 2      | 1       | GroupNorm(1,8)/CELU   |
| Sigmoid                  | 32   | 4              |        |         |                      | Transp Conv $4 \times 4$ | 64   | 4              | 2      | 1       |                       |
|                          |      |                |        |         |                      | Sigmoid                  | 64   | 4              |        |         |                       |

Table 3. U-net architecture (ablation study)

| Layer                                  | Ch       | Stride | Padding | Norm./Act.      |
|----------------------------------------|----------|--------|---------|-----------------|
| Input                                  | 3        |        |         |                 |
| Conv $3 \times 3$                      | 80       | 1      | 1       | BatchNorm /CELU |
| Downsample block                       | 128      |        |         |                 |
| Downsample block                       | 192      |        |         |                 |
| Downsample block                       | 256      |        |         |                 |
| Downsample block                       | 256      |        |         |                 |
| Downsample block                       | 256      |        |         |                 |
| Center block                           | 256      |        |         |                 |
| Upsample block                         | 256      |        |         |                 |
| Upsample block                         | 256      |        |         |                 |
| Upsample block                         | 192      |        |         |                 |
| Upsample block                         | 128      |        |         |                 |
| Upsample block                         | 80       |        |         |                 |
| Conv $3 \times 3$ with skip connection | $d_\Phi$ | 1      | 1       | BatchNorm /CELU |
| Residual Conv $3 \times 3$             | $d_\Phi$ | 1      | 1       |                 |
| Conv $1 \times 1$                      | $d_\Phi$ | 1      | 1       |                 |
